# Supplementary material
Source: publisher figshare collection journal article supplement (https://karger.figshare.com/articles/dataset/_/6809438)
Supplement: Supplementary file 1 [file 1]

Table 1. Dietary formulations

| <i>Ingredient</i>            | <i>Without<br/>selenium</i> | <i>Normal<br/>selenium</i> | <i>High<br/>selenium</i> |
|------------------------------|-----------------------------|----------------------------|--------------------------|
|                              | <i>g/kg diet</i>            | <i>g/kg diet</i>           | <i>g/kg diet</i>         |
| Cornstarch                   | 465.692                     | 465.692                    | 465.692                  |
| Casein                       | 140.000                     | 140.000                    | 140.000                  |
| Dextrinized cornstarch       | 155.000                     | 155.000                    | 155.000                  |
| Sucrose                      | 100.000                     | 100.000                    | 100.000                  |
| Soybean oil                  | 40.000                      | 40.000                     | 40.000                   |
| Fiber                        | 50.000                      | 50.000                     | 50.000                   |
| Minerals (AIN-93M-MX)        | 35.000                      | 35.000                     | 35.000                   |
| - Sodium selenate, anhydrous | 0.000                       | 0.01025                    | 0.03075                  |
| Vitamins (AIN-93-VX)         | 10.000                      | 10.000                     | 10.000                   |
| L-Cystine                    | 2.000                       | 1.800                      | 1.800                    |
| Choline bitartrate           | 3.000                       | 2.500                      | 2.500                    |
| Tert-butylhydroquinone       | 0.008                       | 0.008                      | 0.008                    |
